# Supplementary material for: Is the push-pull paradigm useful to explain rural-urban migration? A case study in Uttarakhand, India
Source: PubMed Central journal article supplement (PMC6445429; doi:10.1371/journal.pone.0214511), 2019-04-02
Supplement: pone.0214511.s001.pdf [file pone.0214511.s001.pdf]

## ANNEX

### A1. Questionnaire

|                               |  |  |                  |
|-------------------------------|--|--|------------------|
| <b>Questionnaire number</b>   |  |  |                  |
| <b>Starting / ending time</b> |  |  | <b>Duration:</b> |
| <b>Neighbourhood</b>          |  |  |                  |

## RURAL-URBAN MIGRATION

This questionnaire includes several questions about your migration from a rural area to Dehradun. It is part of my Master's thesis and I will highly appreciate your participation in my research. By answering these questions, you will help me a lot to carry out my work. Thank you very much!

### Household head (HHH)

Name  Age

#### Sex

1 Male  2 Female

Origin (rural area)

Year of migrating from rural to urban area

#### Marital Status

1 Married  2 Single  3 Widowed  4 Divorced

Occupation before migrating

Occupation now

#### Literate?

Yes |  No

#### Education

0 None  1 Primary (5 years)  2 Middle (8 years)  
 3 Secondary/ High School/ Matriculation (10 years)  4 More than 10 years

### Household (HH) members (including everybody, also HH head)

| By age                | 0-15 |    | 16-55 |    | > 55 |    | Total no. |
|-----------------------|------|----|-------|----|------|----|-----------|
| Sex                   | m    | f  | m     | f  | m    | f  |           |
| Number                |      |    |       |    |      |    |           |
| Literate?             | yes  | no | yes   | no | yes  | no |           |
| Education level (0-4) |      |    |       |    |      |    |           |

### Reasons for and consequences of migrating

Did you come alone?

Yes    No, I came with     My husband / wife     My children     Other \_\_\_\_\_

Why did you decide to move?

Did/ do you own land in the area you migrated from?

No     Yes, I owned \_\_\_\_\_     Yes, I still own \_\_\_\_\_

Were you involved in agriculture?

Yes |  No

| Problem                                                                                                       | yes | no |
|---------------------------------------------------------------------------------------------------------------|-----|----|
| Educational opportunities                                                                                     |     |    |
| Land tenure issues                                                                                            |     |    |
| Problems with agriculture<br>(own production, low or decreasing productivity, weather and climate issues,...) |     |    |
| Landscape / Demographic changes (erosion, deforestation, other people abandoning the village)                 |     |    |
| Marriage related                                                                                              |     |    |
| Finance related                                                                                               |     |    |
| Facilities (hospital, bank, infrastructure)                                                                   |     |    |
| Political / Social                                                                                            |     |    |

|                                           |  |  |
|-------------------------------------------|--|--|
| Development project like dams / roads etc |  |  |
| Others                                    |  |  |

If yes, whose land did you work on?

- Own agricultural land
  Parents' agricultural land  
 Other family's member's agricultural land
  Other person's agricultural land

## Problems

Problems before migrating

Problems after migrating

| Problem                                                                                                       | yes | no |
|---------------------------------------------------------------------------------------------------------------|-----|----|
| Educational opportunities                                                                                     |     |    |
| Land tenure issues                                                                                            |     |    |
| Problems with agriculture<br>(own production, low or decreasing productivity, weather and climate issues,...) |     |    |
| Landscape / Demographic changes (erosion, deforestation, other people abandoning the village)                 |     |    |
| Marriage related                                                                                              |     |    |
| Finance related                                                                                               |     |    |
| Facilities (hospital, bank, infrastructure)                                                                   |     |    |
| Political / Social                                                                                            |     |    |
| Development project like dams / roads etc                                                                     |     |    |
| Others                                                                                                        |     |    |

## Income

How has migrating affected your household income?

- Positively |  Negatively

---

Household income

Before migrating \_\_\_\_\_

After migrating \_\_\_\_\_

---

What was your main source of income **before** migrating to Dehradun?

---

What is your main source of income **after** migrating to Dehradun?

### Conditions of the rural area

---

How easy do you think it is to work in a non-agricultural sector in your village?

Impossible       Difficult       Normal       Easy

---

Have you ever visited your village after migrating?

Yes |  No

---

If yes, for what reason?

---

If given the chance, would you like to go back to your native village?

Yes |  No

---

If yes, under which condition would you go back to your village?

### Your view on rural-urban migration in Uttarakhand

---

Which, do you think, is the reason most people migrate from rural to urban areas in Uttarakhand?

---

What do you think was more relevant for migrating in your case?

| Factors                                                  | Example                                                                                                                                        | Choice |
|----------------------------------------------------------|------------------------------------------------------------------------------------------------------------------------------------------------|--------|
| <b>Push</b><br>(bad conditions in the rural area)        | too low income, negatively influencing development projects like dams / roads. limited opportunities, no available potential marriage partners |        |
| <b>Pull</b><br>(attractive conditions of the urban area) | education opportunities, infrastructure, facilities like hospitals etc, enjoyment, security                                                    |        |

---

What is the major attraction of the immigrants to this area?

---

What is the major attraction of the immigrants to this area?

---

Is there anything that you are missing after migrating (social / cultural / environmental etc)?

Yes |  No

---

If yes: please specify.

---

Do you know other persons who migrated from rural to urban areas?

Yes |  No

---

If yes, could you tell us their names and a contact?

---

Thank you for taking the time to fill out our survey. Your input is greatly appreciated.
